# Supplementary material for: A Europium Nanosphere-Based Time-Resolved Fluorescent Immunochromatographic Assay for the Rapid Screening of 4,4′-Dinitrocarbanilide: Aiming at Improving Strip Method Performance
Source: MDPI journal article supplement (doi:10.3390/bios13050518), 2023-05-04
Supplement: s1 [file s1]

biosensors

## **A Europium Nanosphere-based Time-resolved Fluorescent Immunochromatographic Assay for the Rapid Screening of 4, 4'-Dinitrocarbanilide in Chicken Muscle: Aiming at Improving Strip Method Performance**

Ming Zou <sup>1, a</sup>, Yongkang Yin <sup>1, a</sup>, Liuchuan Guo <sup>1, a</sup>, Qidi Zhang <sup>1, a</sup>, Jinyan Li <sup>1, a</sup>, Hong Zhang <sup>1, a</sup>, Qian Song <sup>1, a</sup>, Zhaojie Li <sup>1, a</sup>, Li Wang <sup>1, b</sup>, Xiang Ao <sup>c</sup>, Xiao Liang <sup>a, c, \*</sup>

<sup>a</sup>College of Veterinary Medicine, Qingdao Agricultural University, No. 700 Changcheng Road, Qingdao 266109, People's Republic of China

<sup>b</sup>College of Food Science and Engineering, Qingdao Agricultural University, No. 700 Changcheng Road, Qingdao 266109, People's Republic of China

<sup>c</sup>Basic Medical College, Qingdao University, No. 308 Ningxia Road, Qingdao 266071, People's Republic of China

\* Author to whom correspondence should be addressed:

Xiao Liang Tel: +8613964867357; E-mail: liangxiao4000@163.com

**Table S1.** Three reconstitution buffers for the Eu<sup>3+</sup>- labeled antibody.

| Reconstitution buffer | Composition            | Usage   |
|-----------------------|------------------------|---------|
| 1 <sup>#</sup>        | BSA                    | 1 g     |
|                       | Sucrose                | 3 g     |
|                       | Prolin 300             | 2 µL    |
|                       | Borate buffer (0.02 M) | 100 mL  |
| 2 <sup>#</sup>        | BSA                    | 1 g     |
|                       | PEG 20000              | 0.05 g  |
|                       | Prolin 300             | 2 µL    |
|                       | 0.01 M PBS (pH 7.4)    | 100 mL  |
| 3 <sup>#</sup>        | Tris                   | 0.605 g |
|                       | BSA                    | 5 g     |
|                       | Sucrose                | 10 g    |
|                       | Trehalose              | 10 g    |
|                       | Prolin 300             | 10 µL   |
|                       | H <sub>2</sub> O       | 500 mL  |

**Table S2.** Sample dilution buffers used in TRFICA.

| Sample dilution buffer   | Composition                                          | Usage    |
|--------------------------|------------------------------------------------------|----------|
| 0.01 M PBS               | Na <sub>2</sub> HPO <sub>4</sub> •12H <sub>2</sub> O | 0.290 g  |
|                          | NaH <sub>2</sub> PO <sub>4</sub> •2H <sub>2</sub> O  | 0.024 g  |
|                          | NaCl                                                 | 0.800 g  |
|                          | KCl                                                  | 0.020 g  |
|                          | H <sub>2</sub> O                                     | 1,000 mL |
| Sample dilution buffer 1 | Tween-20                                             | 50 µL    |
|                          | 0.2 mM Tris-HCl                                      | 10 mL    |
| Sample dilution buffer 2 | PVP                                                  | 0.050 g  |
|                          | 0.2 mM Tris-HCl                                      | 10 mL    |

**Table S3.** Seven extraction solvents used in TRFICA.

| Extraction solvents                | V: V |
|------------------------------------|------|
| Acetonitrile                       | 1    |
| Methanol                           | 1    |
| Acetonitrile: Trichloroacetic acid | 1: 3 |
| Acetonitrile: Trichloroacetic acid | 1:1  |
| Acetonitrile: Trichloroacetic acid | 3:1  |
| Ethyl acetate                      | 1    |
| Dichloromethane                    | 1    |
